# Supplementary material
Source: publisher figshare collection journal article supplement (https://acs.figshare.com/ndownloader/files/12977234)
Supplement: Supplementary file 1 [file 12977234]

**Ectopic overexpression of bol-miR171b increases chlorophyll content and results  
in sterility in broccoli (*Brassica oleracea* L var. *italica*)**

Hui Li<sup>†,‡</sup>, Qingli Zhang<sup>†</sup>, Lihong Li<sup>†</sup>, Jiye Yuan<sup>†</sup>, Yu Wang<sup>†</sup>, Mei Wu<sup>†</sup>, Zhanpin Han<sup>‡</sup>,  
Min Liu<sup>§</sup>, Chengbin Chen<sup>†</sup>, Wenqin Song<sup>†</sup>, Chunguo Wang<sup>\*,†</sup>

<sup>†</sup>College of Life Sciences, Nankai University, Tianjin, China;

<sup>‡</sup>College of Horticulture and Landscape, Tianjin Agricultural University, Tianjin,  
China

<sup>§</sup> College of Life Sciences, Shandong Normal University, Jinan, Shandong, China

\*Correspondence: email: [wangcg@nankai.edu.cn](mailto:wangcg@nankai.edu.cn)

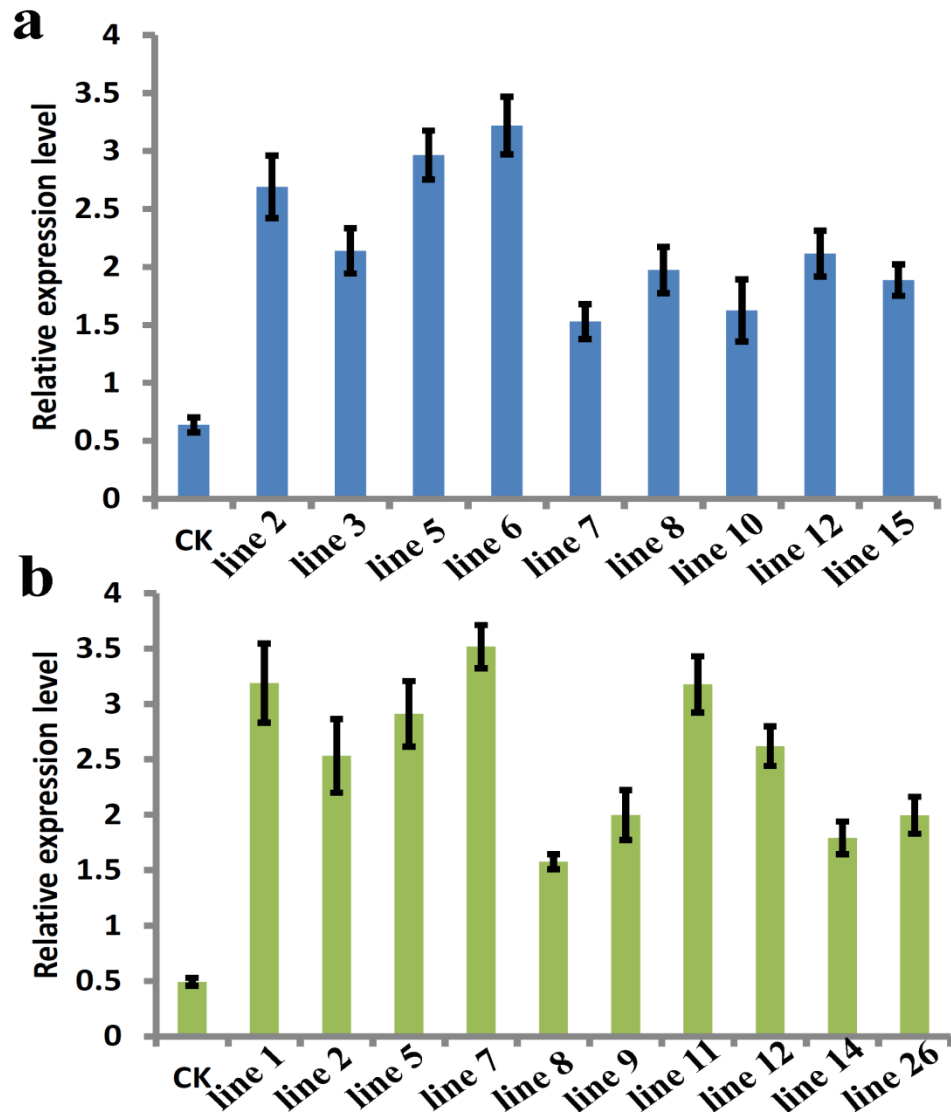

**Figure S1** Expression levels of the *bol-miR171b* precursor in the independent *35S::bol-miR171b* transgenic *Arabidopsis* lines (a) and the *35S::bol-miR171b* transgenic broccoli (b) detected by qRT-PCR. CK (vector controls). “line + numbers” indicated the different transgenic lines in *Arabidopsis* or broccoli.

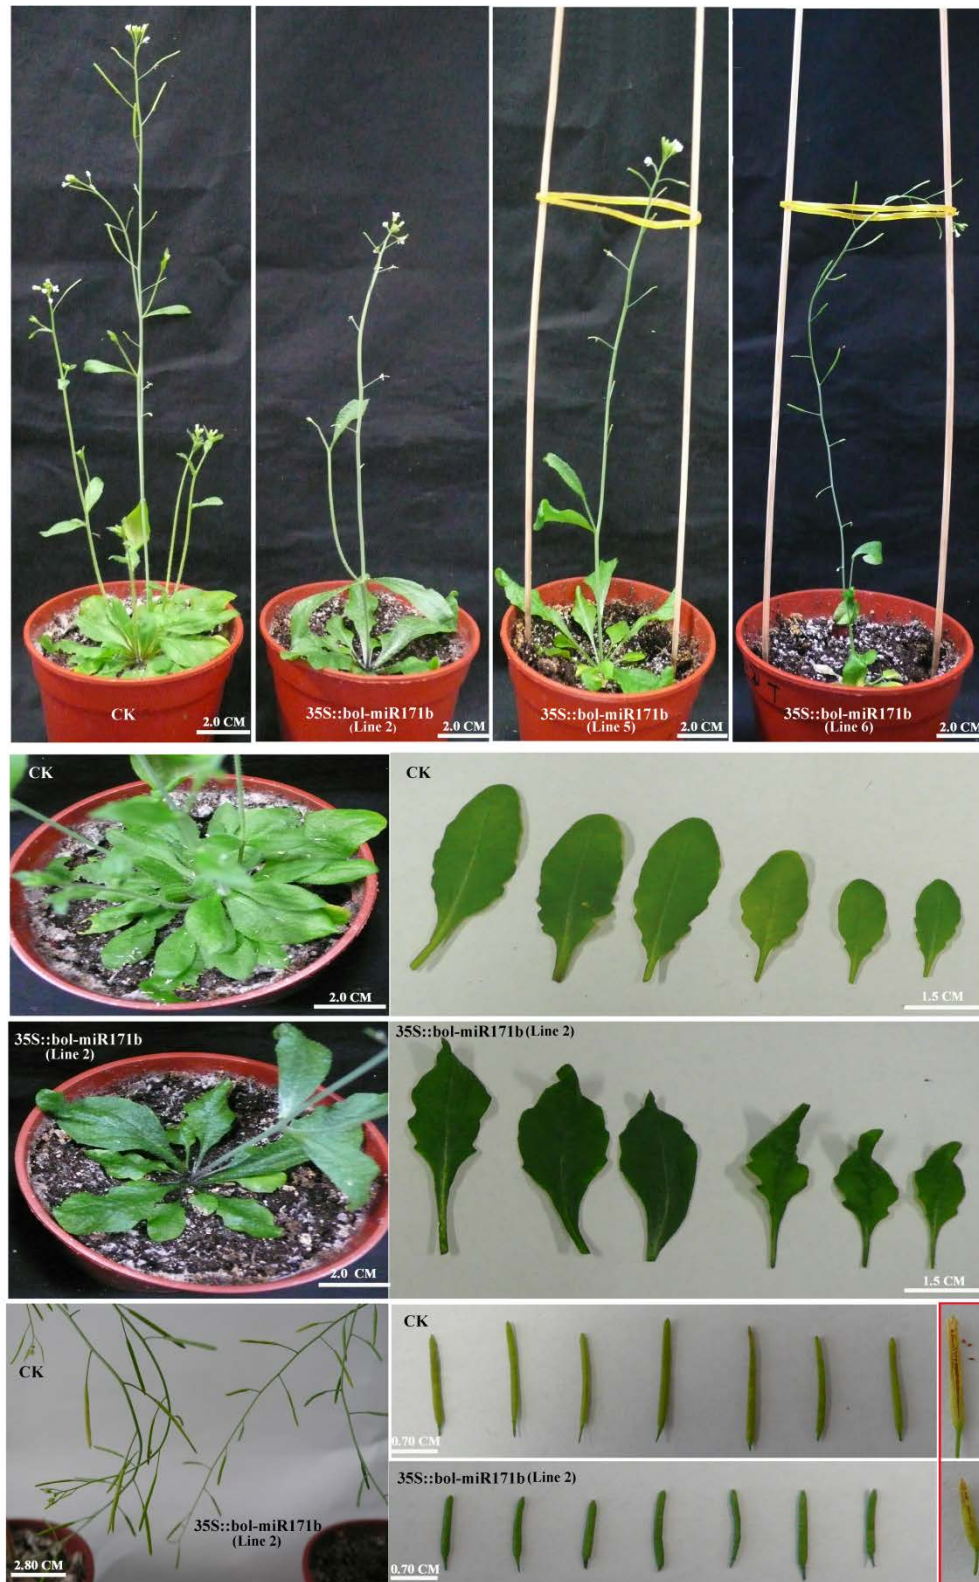

**Figure S2** Phenotypes of the overexpressed *bol-miR171b* in *Arabidopsis*. CK showed the vector control. *35S::bol-miR171b* (line + numbers) showed the overexpressed *bol-miR171b* transgenic lines. The mature silique showed in the red box.

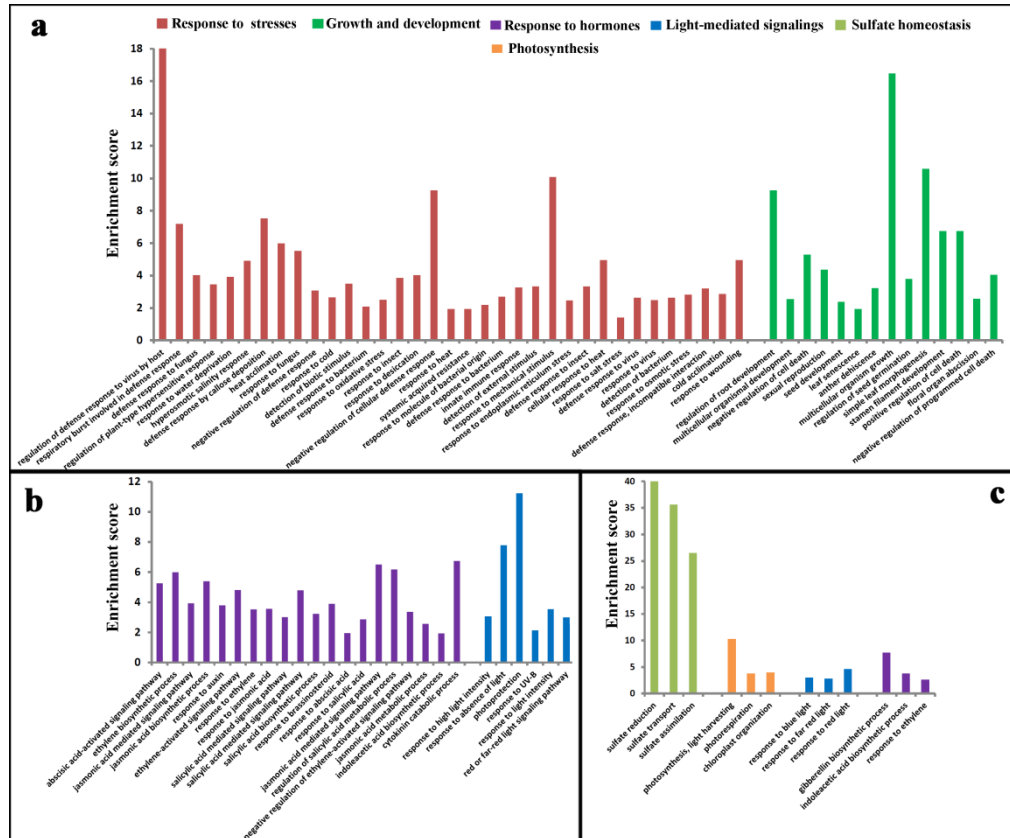

**Figure S3** GO enrichments of the differentially expressed genes between the *35S::bol-miR171b* transgenic broccoli and the vector controls. (a) and (b) The significantly enriched GO terms targeted by the up-regulated genes in the *35S::bol-miR171b* transgenic broccoli (corrected  $p$ -value < 0.05). (c) The significantly enriched GO terms targeted by the down-regulated genes in the *35S::bol-miR171b* transgenic broccoli (corrected  $p$ -value < 0.05). Significantly enriched GO terms in different biological processes are distinguished by the bar color.

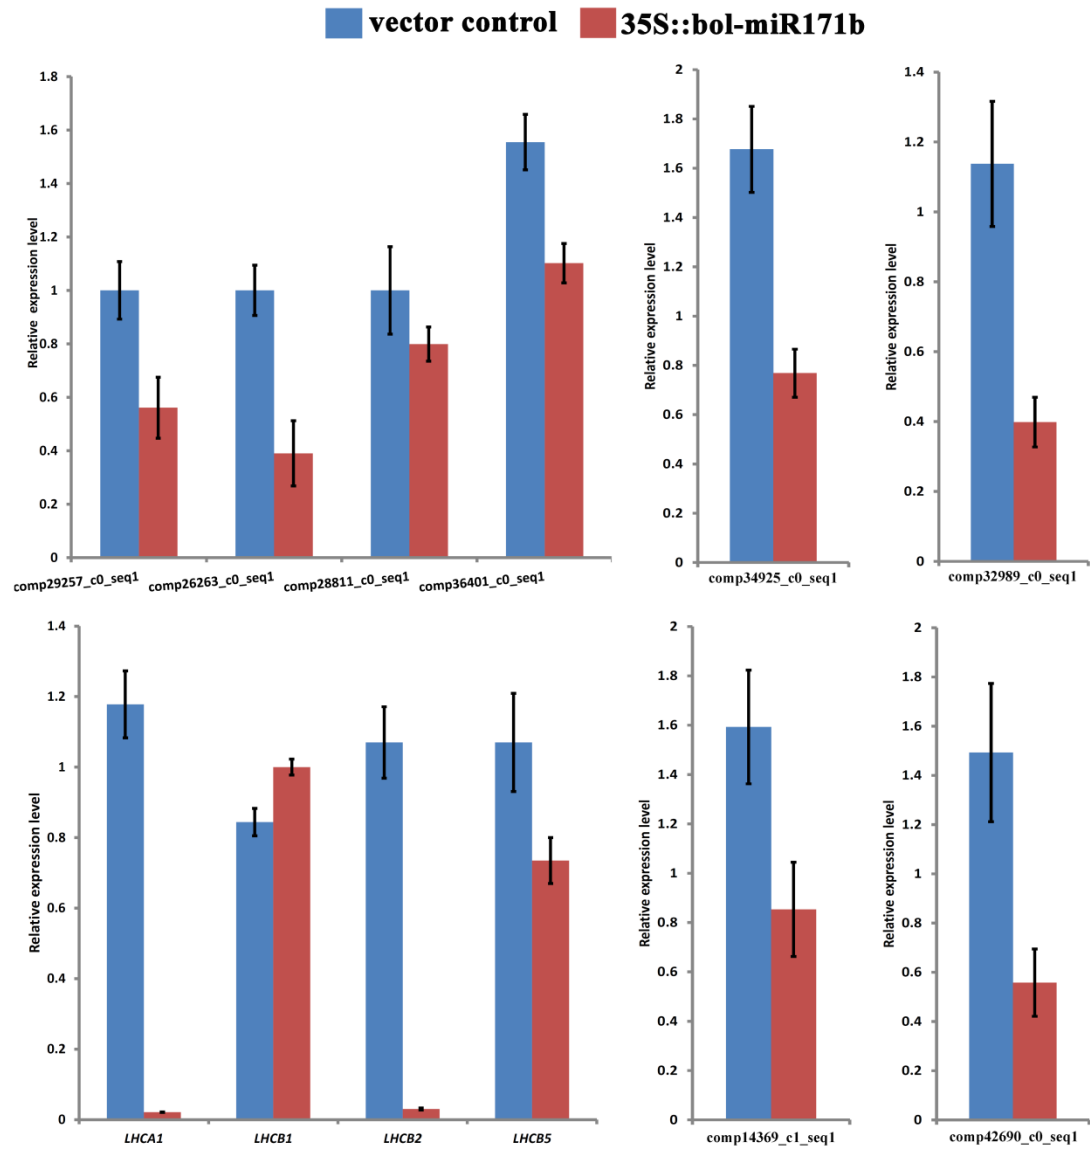

**Figure S4** Expression levels of the genes involved in chloroplast development and sulfate homeostasis detected by qRT-PCR. The functional annotation of the corresponding genes can be found in Table S3.

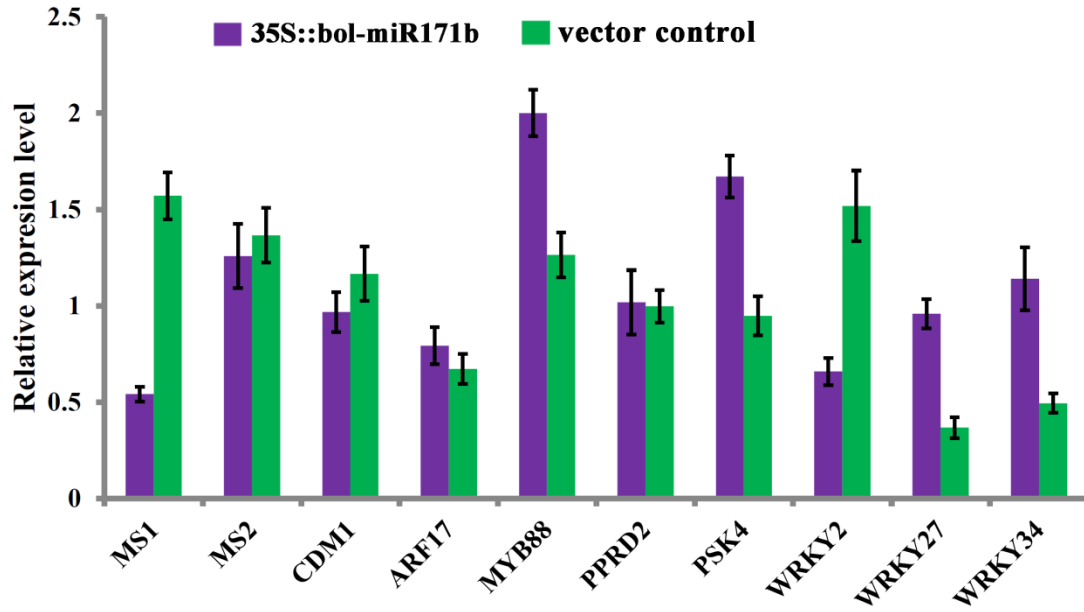

**Figure S5** Expression levels of the marker genes involved in plant sterility. All these genes have been demonstrated to play important roles in the sterility of other plant species. *MS1* (male sterility 1), *MS2* (male sterility 2), *CDM1* (*CALLOSE DEFECTIVE MICROSPORE1*), *ARF17* (*AUXIN RESPONSE FACTOR17*), *PPRD2* (*polyprenol reductase 2*) and *PSK4* (*Phytosulfokine 4*).
